# Supplementary material for: Oral Delivery of miR-320-3p with Lipidic Aminoglycoside Derivatives at Mid-Lactation Alters miR-320-3p Endogenous Levels in the Gut and Brain of Adult Rats According to Early or Regular Weaning
Source: MDPI journal article supplement (doi:10.3390/ijms24010191), 2022-12-22
Supplement: s1 [file s1]

*Article*

# Oral Delivery of miR-320-3p with Lipidic Aminoglycoside Derivatives at Mid-Lactation Alters miR-320-3p Endogenous Levels in the Gut and Brain of Adult Rats According to Early or Regular Weaning

Gabriel Araujo Tavares <sup>1,2,†,‡</sup>, Amada Torres <sup>1,†</sup>, Gwenola Le Drean <sup>1</sup>, Maïwenn Queignec <sup>1</sup>, Blandine Castellano <sup>1</sup>, Laurent Tesson <sup>3</sup>, Séverine Remy <sup>3</sup>, Ignacio Anegón <sup>3</sup>, Bruno Pitard <sup>4</sup> and Bertrand Kaeffer <sup>1,\*</sup>

**Supplementary Materials:** Excel files of raw Cq data organized by tissues can be made accessible at the UN-Cloud of the University of Nantes.

**Table-S1:** miR Pathway enrichment analysis for rno-miR-320-3p and rno-miR-375-3p. To identify pathways from the list of the potential regulated mRNA we used Panther v 16.0 (released 2020-12-01, <http://www.pantherdb.org/>). To ensure the validity of our findings, we only considered the three pathways more relevant on both miRNAs.

The potential 111 co-regulated transcript by miR-320-3p are distribute between 69 pathways, while the 24 candidates genes associated to miR-375-3p were found in 12 pathways. Interesting, both miRs present the pathways of: a) Inflammation mediated by chemokines and cytokines signaling pathway, b) Interferon-gamma signaling pathway and c) Wnt signaling pathway, with different interacting genes

A. Result of PANTHER Full list of pathway related with miR-320-3p

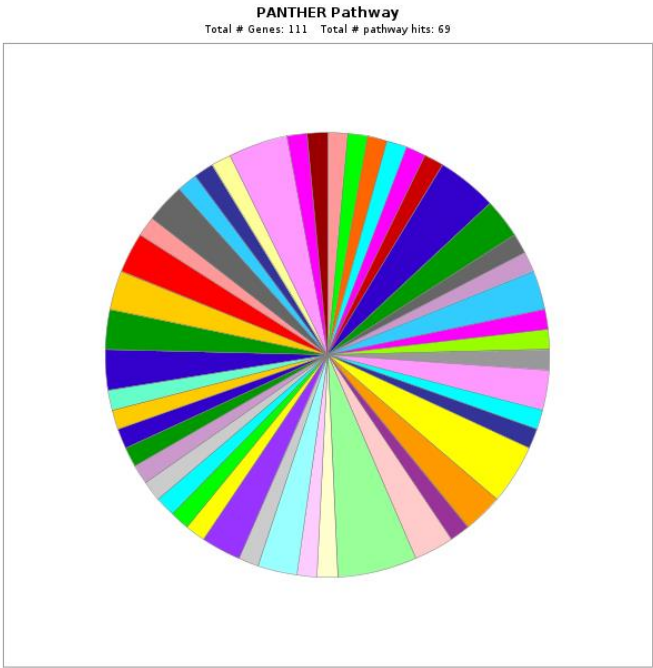

|                                                                                                                                                             |                                                                                   |                                                                                       |
|-------------------------------------------------------------------------------------------------------------------------------------------------------------|-----------------------------------------------------------------------------------|---------------------------------------------------------------------------------------|
| **                                                                                                                                                          | Click to get gene list for a category:                                            |                                                                                       |
| Chart tooltips are read as: Category name (Accession): # genes; Percent of gene hit against total # genes; Percent of gene hit against total # Pathway hits | 5HT1 type receptor mediated signaling pathway (P04373)                            |  |
|                                                                                                                                                             | Alzheimer disease-amyloid secretase pathway (P00003)                              |  |
|                                                                                                                                                             | Angiogenesis (P00005)                                                             |  |
|                                                                                                                                                             | Angiotensin II-stimulated signaling through G proteins and beta-arrestin (P05911) |  |
|                                                                                                                                                             | Apoptosis signaling pathway (P00006)                                              |  |
|                                                                                                                                                             | B cell activation (P00010)                                                        |  |
|                                                                                                                                                             | CCKR signaling map (P06959)                                                       |  |
|                                                                                                                                                             | Cadherin signaling pathway (P00012)                                               |  |
|                                                                                                                                                             | Cytoskeletal regulation by Rho GTPase (P00016)                                    |  |
|                                                                                                                                                             | Dopamine receptor mediated signaling pathway (P05912)                             |  |
|                                                                                                                                                             | EGF receptor signaling pathway (P00018)                                           |  |
|                                                                                                                                                             | Endogenous cannabinoid signaling (P05730)                                         |  |
|                                                                                                                                                             | Endothelin signaling pathway (P00019)                                             |  |
|                                                                                                                                                             | Enkephalin release (P05913)                                                       |  |

FGF signaling pathway (P00021)  
 GABA-B receptor II signaling (P05731)  
 Glycolysis (P00024)  
 Gonadotropin-releasing hormone receptor pathway (P06664)  
 Heterotrimeric G-protein signaling pathway-Gi alpha and Gs alpha mediated pathway (P00026)  
 Heterotrimeric G-protein signaling pathway-Gq alpha and Go alpha mediated pathway (P00027)  
 Huntington disease (P00029)  
 Inflammation mediated by chemokine and cytokine signaling pathway (P00031)  
 Insulin/IGF pathway-mitogen activated protein kinase kinase/MAP kinase cascade (P00032)  
 Insulin/IGF pathway-protein kinase B signaling cascade (P00033)  
 Integrin signalling pathway (P00034)  
 Interferon-gamma signaling pathway (P00035)  
 Interleukin signaling pathway (P00036)  
 Metabotropic glutamate receptor group II pathway (P00040)  
 Metabotropic glutamate receptor group III pathway (P00039)  
 Muscarinic acetylcholine receptor 2 and 4 signaling pathway (P00043)  
 Nicotine pharmacodynamics pathway (P06587)  
 Nicotinic acetylcholine receptor signaling pathway (P00044)  
 Opioid prodynorphin pathway (P05916)  
 Opioid proenkephalin pathway (P05915)  
 Opioid proopiomelanocortin pathway (P05917)  
 Ornithine degradation (P02758)  
 PDGF signaling pathway (P00047)  
 PI3 kinase pathway (P00048)  
 Parkinson disease (P00049)  
 Ras Pathway (P04393)  
 T cell activation (P00053)  
 TGF-beta signaling pathway (P00052)  
 Toll receptor signaling pathway (P00054)  
 Ubiquitin proteasome pathway (P00060)  
 VEGF signaling pathway (P00056)  
 Wnt signaling pathway (P00057)  
 p53 pathway feedback loops 2 (P04398)  
 p53 pathway (P00059)

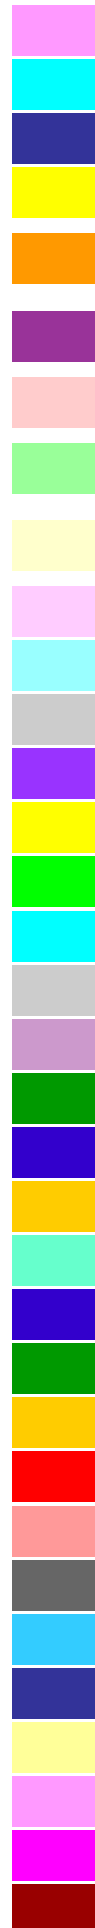

B. Result of PANTHER Full list of pathway related with miR-375-3p

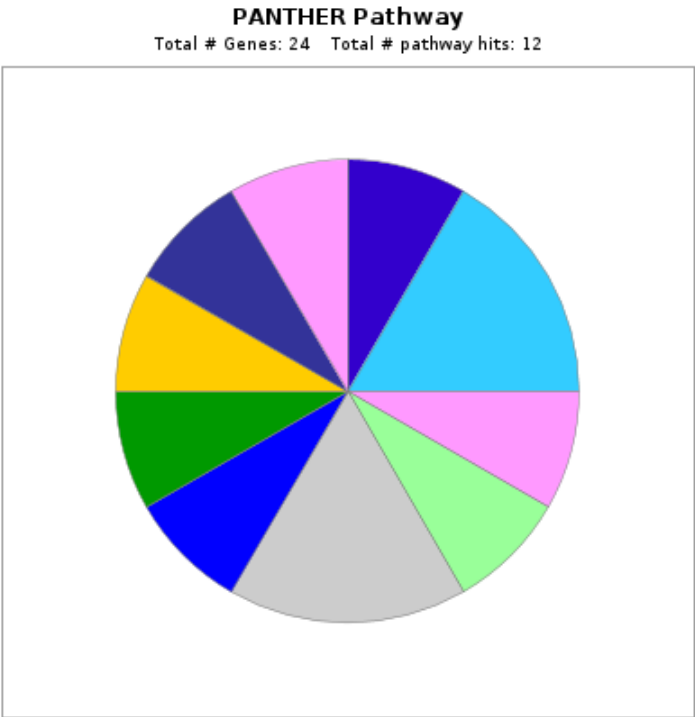

Click to get gene list for a category:

- [CCKR signaling map \(P06959\)](#)
- [EGF receptor signaling pathway \(P00018\)](#)
- [FGF signaling pathway \(P00021\)](#)
- [Inflammation mediated by chemokine and cytokine signaling pathway \(P00031\)](#)
- [Interferon-gamma signaling pathway \(P00035\)](#)
- [JAK/STAT signaling pathway \(P00038\)](#)
- [PI3 kinase pathway \(P00048\)](#)
- [Parkinson disease \(P00049\)](#)
- [Ubiquitin proteasome pathway \(P00060\)](#)
- [Wnt signaling pathway \(P00057\)](#)

**Table S2.** Details of the primers used to construct the transgenic rats, and quantified 9 miRNA and 38 mRNA.

| Gene Name               | Primer Sequence                 | Reference |
|-------------------------|---------------------------------|-----------|
| rROSA-fw1               | TGAACTGTGAATAGGCCCAAGTG         | [62]      |
| rROSA-rev1              | GCATTTTAAAAGAGCCCAGTACTTCA      | [62]      |
| GFP Up                  | CCTCGTGACCACCCTGACCT            | [62]      |
| GFP Lo3                 | TCCATGCCGAGAGTGATCCC            | [62]      |
| rROSA26-5outFor         | TCCCACCCTCCCCTTCCTCT            | [62]      |
| 5rCCKpRev               | TGTGACCCCGTTGCCCTGGAT           | [62]      |
| 3BGHpA-Up2              | CCAGATTTTTCCTCCTCTCCTG          | [62]      |
| rROSA26-3outRev         | TGGGTATCACTGGCTGTCCTAGATA       | [62]      |
| microRNAs               | TaqMan System                   |           |
| Let-7d-5p               | Advanced-rno478439_mir          |           |
| Let-7g-5p               | Advanced-rno478580_mir          |           |
| rno-miR-132-3p          | Advanced-rno480919_mir          |           |
| rno-miR-146b            | Advanced-rno480941_mir          |           |
| rno-miR-16-5p           | Advanced rno481312_mir          |           |
| rno-miR-320-3p          | Advanced-rno481048_mir          |           |
| rno-miR-375-3p          | Advanced-rno481142_mir          |           |
| rno-miR-375-5p          | Advanced-rno481142_mir          |           |
| rno-miR-504             | Advanced-rno481198_mir          |           |
| microRNAs               | SYBR-Green System               |           |
| miR-375-5p-fw           | GCGACGAGCCCCUCGCACAAACC         |           |
| Universal miRNA reverse | GCAGGGTCCGAGGTATTC              | [68]      |
| $\beta$ 2-microglobulin | rno0560865_m1                   |           |
| $\beta$ -actin          | rno0667869_m1                   |           |
| usb1                    | rn01536722_m1                   |           |
| Polr3d                  | rno1468090_g1                   |           |
| Hspb6                   | rno0577590_ml                   |           |
| SERT                    | rno00564737_mir                 |           |
|                         | MESSENGER for SYBR-Green System |           |
| GAPDH2-fw               | CGG CAA GTT CAA CGG CAC AG      |           |
| GAPDH2-rv               | TCC ACG ACA TAC TCA TCA GCA CCA |           |

|            |                                |
|------------|--------------------------------|
| β-actin-fw | CTA TCG GCA ATG AGC GGT TCC    |
| β-actin-rv | GCA CTG TGT TGG CAT AGA GGT C  |
| β -2M-fw   | TGA CCG TGA TCT TTC TGG TG     |
| β -2M-rv   | ACT TGA ATT TGG GGA GTT TTC TG |

#### REPORTER GENES

|        |                                 |
|--------|---------------------------------|
| GFP-fw | AAG CTG ACC CTG AAG TTC ATC TGC |
| GFP-rv | CTT GTA GTT GCC GTC GTC CTT GAA |
| CCK-fw | TGC TTG GAG GAG GCG GAA TG      |
| CCK-rv | GCT GGG CTG AGG TGT GTG G       |

#### PROMOTERS

|           |                        |
|-----------|------------------------|
| POLR3D-fw | CAGACCAGTCACCTCATCCTTT |
| POLR3D-rv | AGTATTTATCAGACGGTGCCTC |
| MARF1-fw  | GATAACCCCCTATTTTGAGGTT |
| MARF1-rv  | GCGTCTTCTCCGCGCAGGGCAT |

#### FUNCTIONAL GENES

|              |                            |
|--------------|----------------------------|
| Rghrl -fw    | AGAGGCGCCAGCTAACAAGTAA     |
| Rghrl - rev  | GCAGGAGAGTGCTGGGAGTT       |
| rGip-fw      | CTCCTGTTCTGGCTGTC          |
| rGip-rev     | GGCGATGCTGTAATCACTG        |
| rPYY-fw      | AGCGGTATGGGAAAAGAGAAGTC    |
| rPYY-rev     | ACCACTGGTCCACACCTTCTG      |
| rCCK-fw      | GCCGCCTGCCCTCAAC           |
| rCCK-rev     | ACACACGCCGCACTTCATATC      |
| rPax6-fw     | ATACCTACACCCCTCCGCAC       |
| rPax6-rev    | TGAGTCCTGTTGAAGTGGTTCC     |
| rPAX4-fw     | GGATACACTGGGAGCCTTGTC      |
| rPAX4-rev    | GGATACACTGGGAGCCTTGTC      |
| rFoxa1-fw    | GTTCCGCACAGGGTTGGATA       |
| rFoxa1-rev   | CTG ACC GGG ACA GAG GAG TA |
| r Chga-fw    | TACCCAATCACCAACCAGCC       |
| r Chga 1 rev | TGAGACTCCGACTGACCATC       |

|                  |                                |
|------------------|--------------------------------|
| 5HT1B-fw         | AGA AGA AAC TCA TGG CCG CT     |
| 5HT1B-rv         | GGG GAG CCA GCA GAG AAT AA     |
| 5HT2C-fw         | ATT TGT GCC CCG TCT TGG ATT    |
| 5HT2C-rv         | CGC GAA TTG AAC CGG CTA TG     |
| BMAL1-fw         | GAC TTC GCC TCC ACC TGT TC     |
| BMAL1-rv         | CAT TGT CTG GTT CAC TGT CTT CG |
| CLOCK-fw         | GAA CTT GGC GTT GAG GAG TCT    |
| CLOCK-rv         | GTG ATC GAA CCT TTC CCA GTG C  |
| DRD1-fw          | GTT TGT GTG GT TGG GTG GG      |
| DRD1-rv          | GCT CAT GGT GGC TGG AAA AC     |
| DRD2-fw          | GAG CCA ACC TGA AGA GAC CA     |
| DRD2-rv          | GCA TCC ATT CTC CGC CTG TT     |
| IFNg-fw          | GAT CCA GCA CAA AGC TGT CA     |
| IFNg-rv          | GAC TCC TTT TCC GCT TCC TT     |
| IL10-fw          | GCA GTA GAG CAG GTG AAG AAT G  |
| IL10-rv          | CAG TAG ACG CCG GGT GGT TC     |
| IL1 $\alpha$ -fw | AAGACAAGCCTGTGTTGCTGAAGG       |
| IL1 $\alpha$ -rv | TCCCAGAAGAAAATGAGGTCGGTC       |
| IL6-fw           | TCC TAC CCC AAC TTC CAA TGC TC |
| IL6-rv           | TTG GAT GGT CTT GGT CCT TAG GG |
| iNOS-fw          | GAT TTT TCA CGA CAC CCT        |
| iNOS-rv          | GGT CCT CTG GTC AAC CTC        |
| PERIOD1-fw       | GCC CTG CTG CCT GCT CAT TG     |
| PERIOD1-rv       | AAC TTG GTG TGT GCC GTG GG     |
| PERIOD2-fw       | GCA CGC TGG CAA CCT TGA AG     |
| PERIOD2-rv       | GGC TGG CTC TCA CTG GAC ATT AG |
| STAT1-fw         | AGG TCC GTC AGC AGC TTA AA     |
| STAT1-rv         | CGA TCG GAT AAC AAC TGC TT     |
| TGF $\beta$ -fw  | AGT GGC TGT TGC GGA GAG        |
| TGF $\beta$ -rv  | GCT GAA AGG TAT GAC ATG GAC A  |
| TNF $\alpha$ -fw | AAATGGGCTCCCTCTCATCAGTTC       |
| TNF $\alpha$ -rv | TCTGCTTGGTGGTTTGCTACC          |
| SIDT-1-fw        | CGTCATCCGGACCAAGATGT           |
| SIDT-1-rev       | AGATGTCCTGGTTGCCAGTG           |

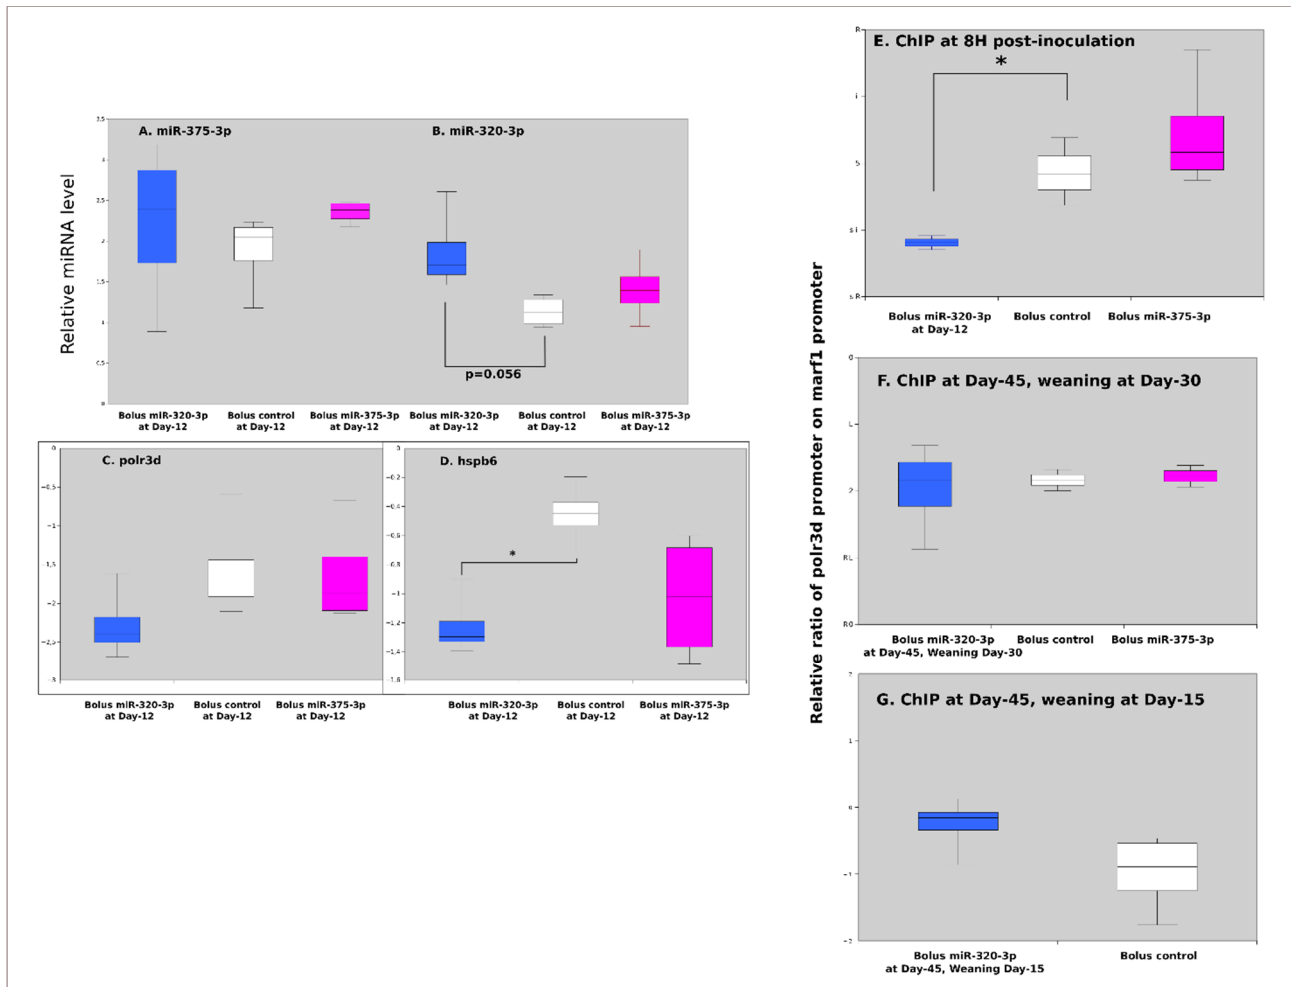

**Figure S1.** Immediate effect of miRNA supplementation. Evolution of miR-375-3p (A), 320-3p (B), polr3d (C) and hspb6 (D) mRNA, 8 hours after bolus for rat pups at Day-12 in stomach wall. Chromatin-immunoprecipitation assay against H3K4me3. Note the significant alteration at 8H after a bolus with miR-320-3p in gastric cells (E) and the absence of memory effect after regular (F) or early (G) weaning. The light gray background reminds that rats were sacrificed in the dark phase. Note: \*  $p<0.05$ ; \*\*  $p<0.01$ ; \*\*\*  $p<0.001$ .



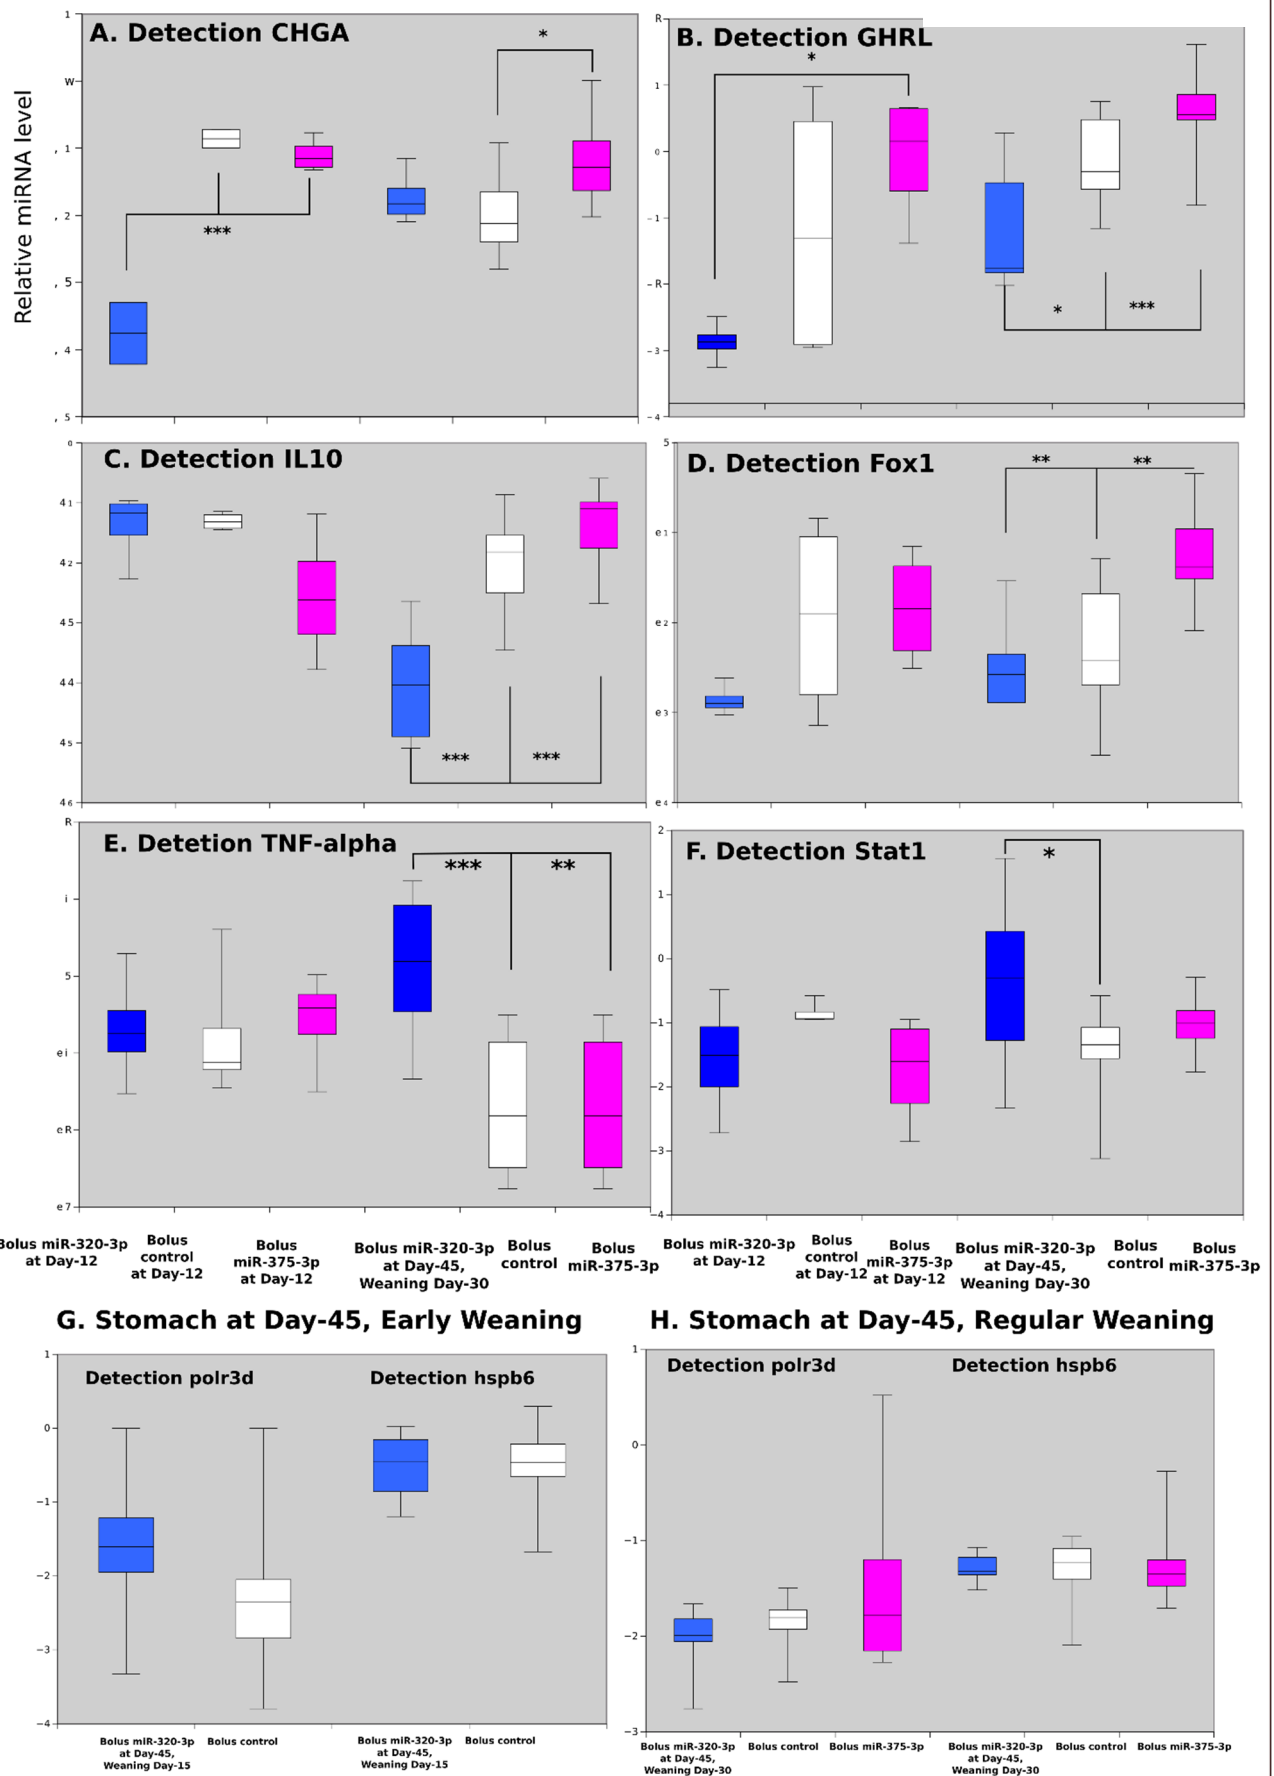

**Figure S2.** Evolution of polr3d and hspb6 mRNAs in stomach wall, at Day-45 after early (A) or regular (B) weaning. Concerning the inflammation status, the IL-10 [C], Fox1 (D), ChGRA (E), and GHRL (F) transcripts were all down-regulated at Day-45 for rat treated with miR-320-3p/DOSP. The levels of polr3d and hspb6 were not different after early (G) or regular (H) weaning. The light gray background reminds that rats were sacrificed in the dark phase. Note: \*  $p < 0.05$ ; \*\*  $p < 0.01$ ; \*\*\*  $p < 0.001$ .

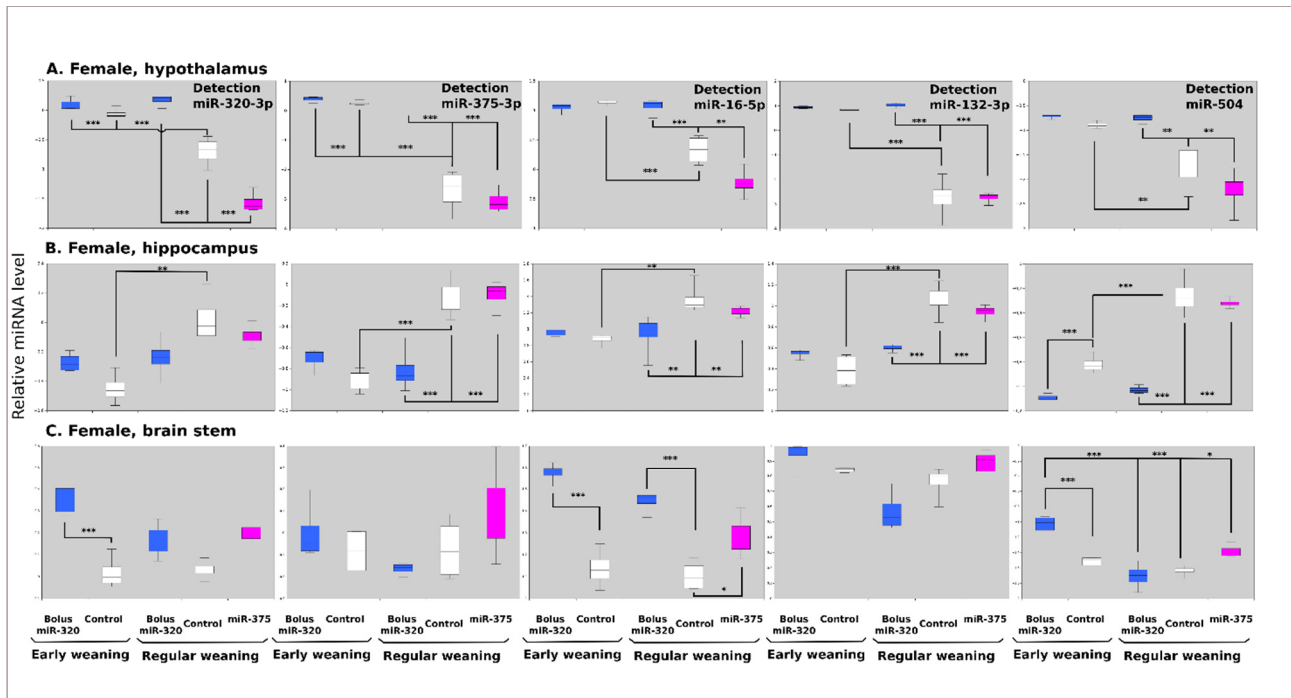

**Figure S3.** Evolution of miRNAs in hypothalamus (A), in hippocampus (B), and in brain stem (C) of females treated with miR-320-3p or 375-3p/DOSP according to early or regular weaning. The light gray background reminds that rats were sacrificed in the dark phase. Note: \*  $p < 0.05$ ; \*\*  $p < 0.01$ ; \*\*\*  $p < 0.001$ .

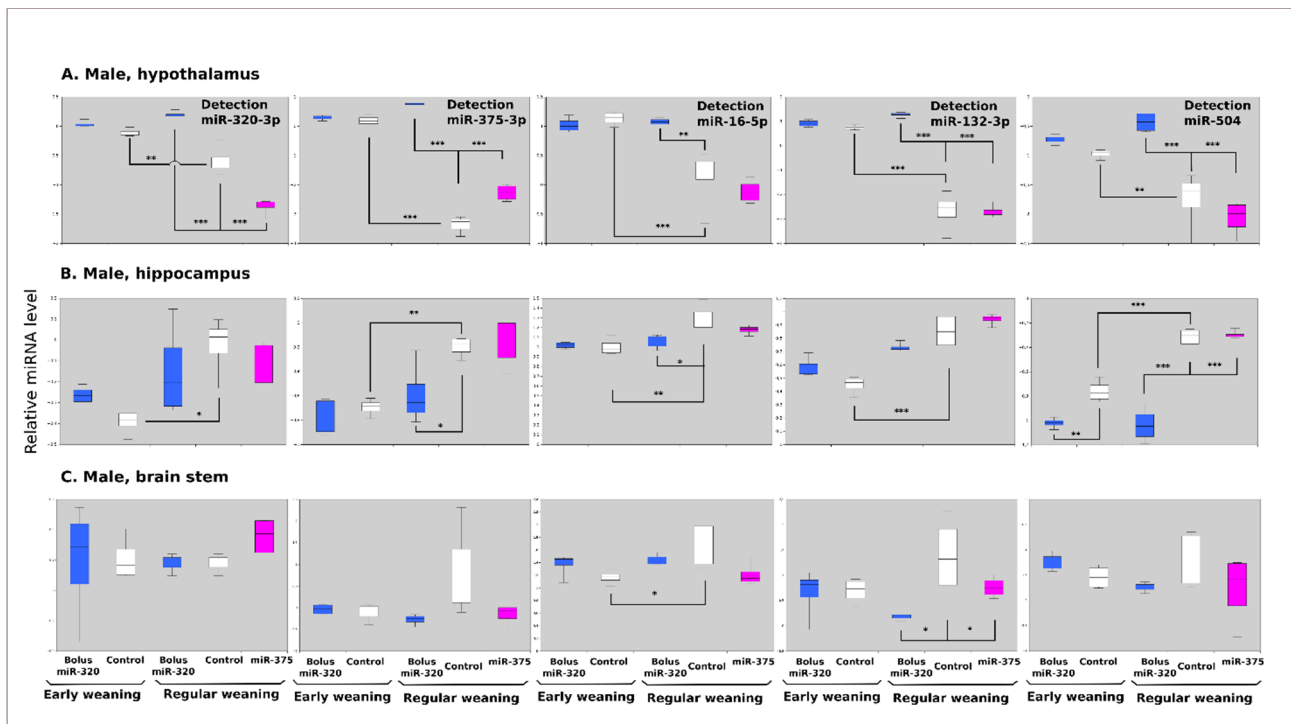

**Figure S4.** Evolution of miRNAs in hypothalamus (A), in hippocampus (B), and in brain stem (C) of males treated with miR-320-3p or 375-3p/DOSP according to early or regular weaning. The light gray background reminds that rats were sacrificed at ZT-20H in the dark phase. Note: \*  $p < 0.05$ ; \*\*  $p < 0.01$ ; \*\*\*  $p < 0.001$ .

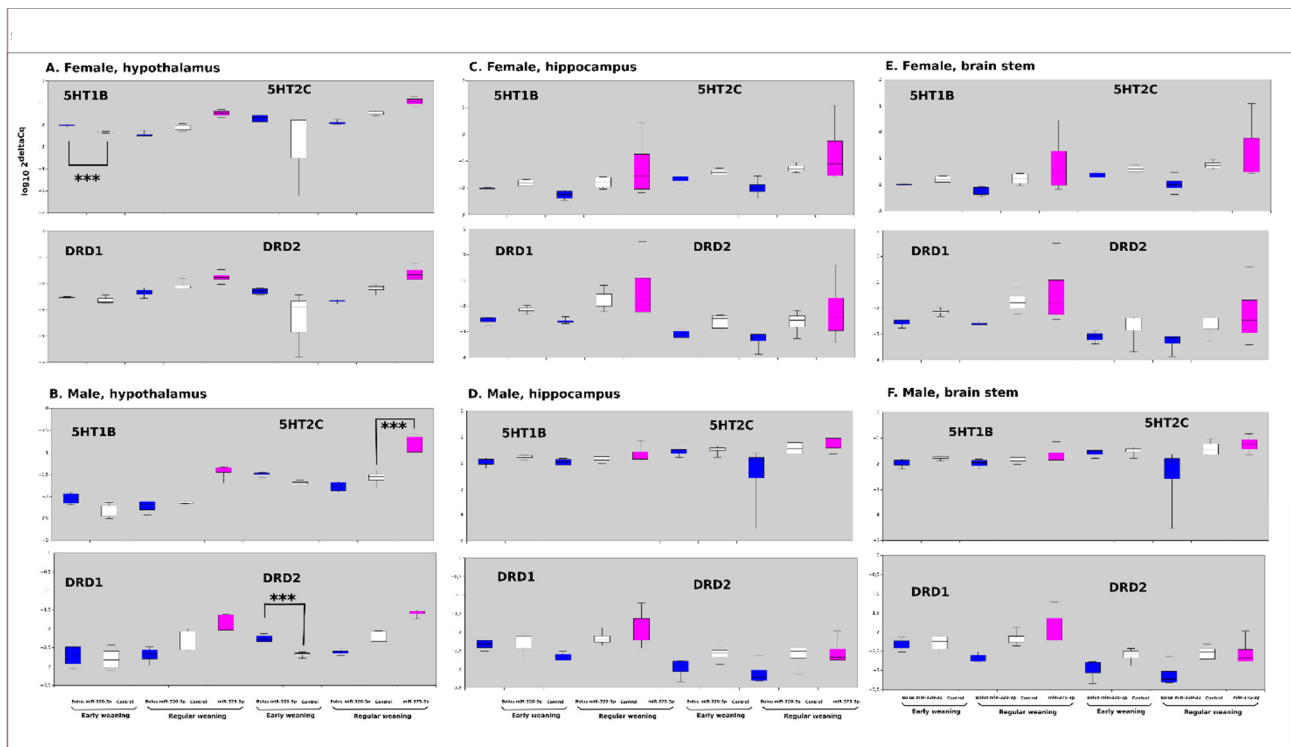

**Figure S5.** Evolution of transcripts related to serotonin and dopaminergic balance (5HT1B, 5HT2C, DRD1, DRD2) in hypothalamus (A, female ; B, male), in hippocampus (C, female ; D, male), and in brain stem (E, female, F, male) of rat treated with miR-320-3p or 375-3p/DOSP according to early or regular weaning. The light gray background reminds that rats were sacrificed in the dark phase. Note: \*  $p<0.05$ ; \*\*  $p<0.01$ ; \*\*\*  $p<0.001$ .

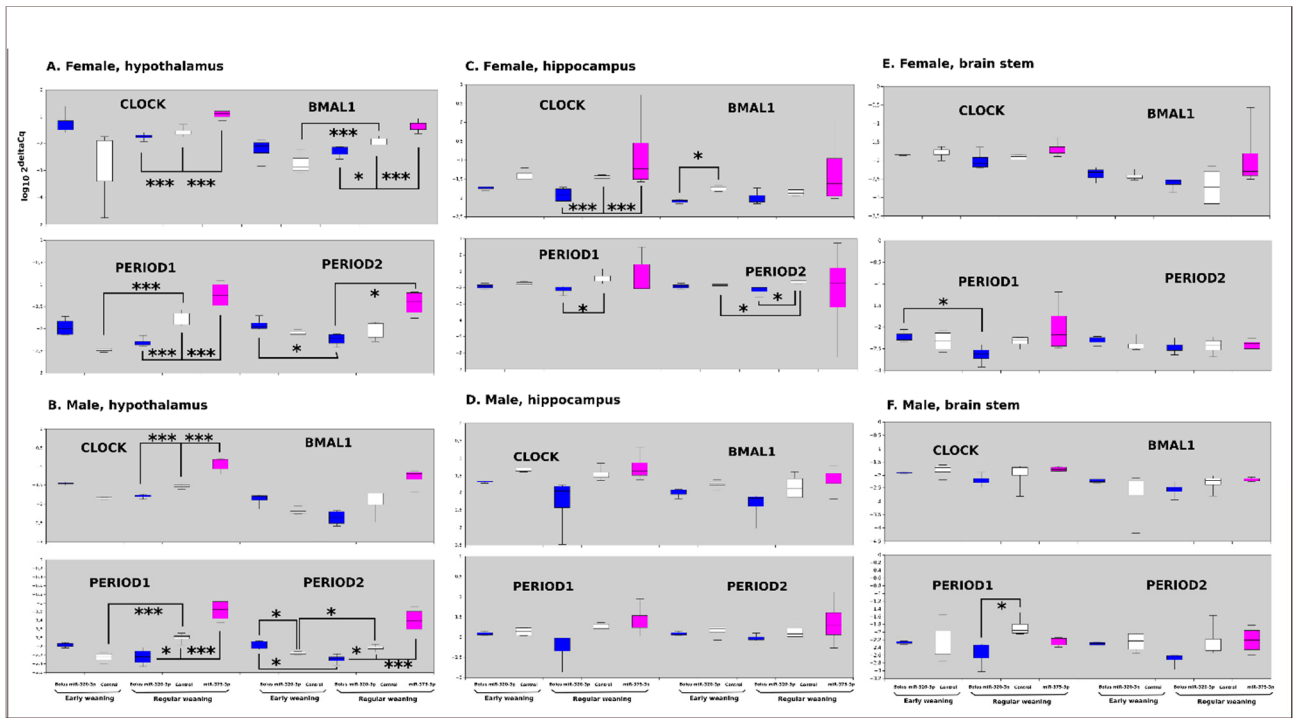

**Figure S6.** Evolution of transcripts related to the circadian clock (clock, bmal1, period1, period2) in hypothalamus (A, female ; B, male), in hippocampus (C, female ; D, male), and in brain stem (E, female, F, male) of rat treated with miR-320-3p or 375-3p/DOSP according to early or regular weaning. The light gray background reminds that rats were sacrificed in the dark phase. Note: \*  $p < 0.05$ ; \*\*  $p < 0.01$ ; \*\*\*  $p < 0.001$ .



**Figure S7.** Evolution of SERT, GFP, CCK transcripts in hypothalamus (A, female ; B, male), in hippocampus (C, female ; D, male), and in brain stem (E, female, F, male) of rat treated with miR-320-3p or 375-3p/DOSP according to early or regular weaning. The light gray background reminds that rats were sacrificed in the dark phase. Note: \*  $p<0.05$ ; \*\*  $p<0.01$ ; \*\*\*  $p<0.001$ .
